# Supplementary material for: Ab initio trajectory surface-hopping dynamics studies of excited-state proton-coupled electron transfer reactions in trianisoleheptazine–phenol complexes
Source: Royal Society of Chemistry journal article supplement (doi:10.1039/d2cp01262f), 2022-01-01
Supplement: d2cp01262f1.pdf [file d2cp01262f1.pdf]

## Supporting Information

### Ab initio trajectory surface-hopping dynamics studies of excited-state proton-coupled electron transfer reactions in trianisoleheptazine-phenol complexes

Xiang Huang and Wolfgang Domcke

Department of Chemistry, Technical University of Munich, D-85747 Garching, Germany

Table S1. Vertical excitation energies (in eV) and oscillator strengths (in parentheses) of the lowest eight singlet excited states of the TAHz⋯HOPh-R (R=H, Cl, Me, MeO) complexes computed at MP2/cc-pVDZ ground-state equilibrium geometries in  $C_s$  symmetry with three different functionals at the TDDFT/def2-SV(P) level. The CT state is marked bold.

|                | CAM-B3LYP    | $\omega$ B97X | $\omega$ B97X-D | CAM-B3LYP     | $\omega$ B97X | $\omega$ B97X-D |
|----------------|--------------|---------------|-----------------|---------------|---------------|-----------------|
| state          | TAHz⋯HOPh-H  |               |                 | TAHz⋯HOPh-Cl  |               |                 |
| S <sub>1</sub> | 3.18         | 3.35          | 3.23            | 3.18          | 3.36          | 3.23            |
| S <sub>2</sub> | <b>3.72</b>  | 4.14          | 3.95            | <b>3.72</b>   | 4.14          | 3.94            |
| S <sub>3</sub> | 3.85         | 4.28          | <b>3.99</b>     | 3.85          | 4.27          | <b>4.02</b>     |
| S <sub>4</sub> | 4.00         | <b>4.65</b>   | 4.09            | 4.00          | <b>4.67</b>   | 4.08            |
| S <sub>5</sub> | 4.47         | 4.75          | 4.56            | 4.47          | 4.74          | 4.55            |
| S <sub>6</sub> | 4.15         | 4.32          | 4.13            | 4.15          | 4.32          | 4.12            |
| S <sub>7</sub> | 4.25         | 4.43          | 4.23            | 4.25          | 4.43          | 4.23            |
| S <sub>8</sub> | 4.35         | 4.51          | 4.32            | 4.35          | 4.53          | 4.33            |
| state          | TAHz⋯HOPh-Me |               |                 | TAHz⋯HOPh-MeO |               |                 |
| S <sub>1</sub> | 3.18         | 3.35          | 3.23            | 3.17          | 3.35          | 3.22            |
| S <sub>2</sub> | <b>3.53</b>  | 4.14          | <b>3.81</b>     | <b>3.26</b>   | 4.14          | <b>3.56</b>     |
| S <sub>3</sub> | 3.85         | 4.29          | 3.95            | 3.85          | <b>4.18</b>   | 3.95            |
| S <sub>4</sub> | 4.00         | <b>4.47</b>   | 4.10            | 4.00          | 4.29          | 4.10            |
| S <sub>5</sub> | 4.47         | 4.75          | 4.56            | 4.47          | 4.74          | 4.56            |
| S <sub>6</sub> | 4.15         | 4.32          | 4.13            | 4.15          | 4.32          | 4.13            |
| S <sub>7</sub> | 4.25         | 4.41          | 4.22            | 4.25          | 4.43          | 4.22            |
| S <sub>8</sub> | 4.34         | 4.51          | 4.32            | 4.35          | 4.51          | 4.32            |

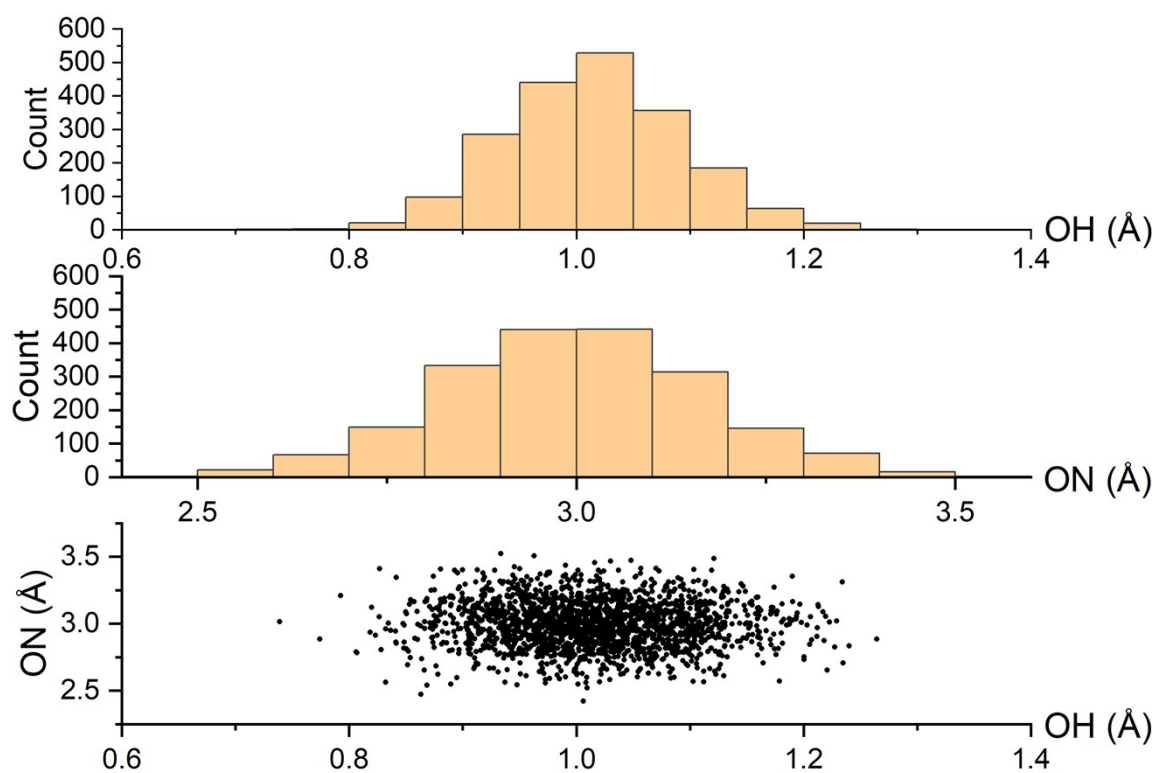

Figure S1. The distribution of the OH bond length (the H-atom transfer coordinate) and the ON bond length (the donor-acceptor distance of the H-atom transfer) in the ground-state thermal Wigner sample comprising 2000 phase space points.

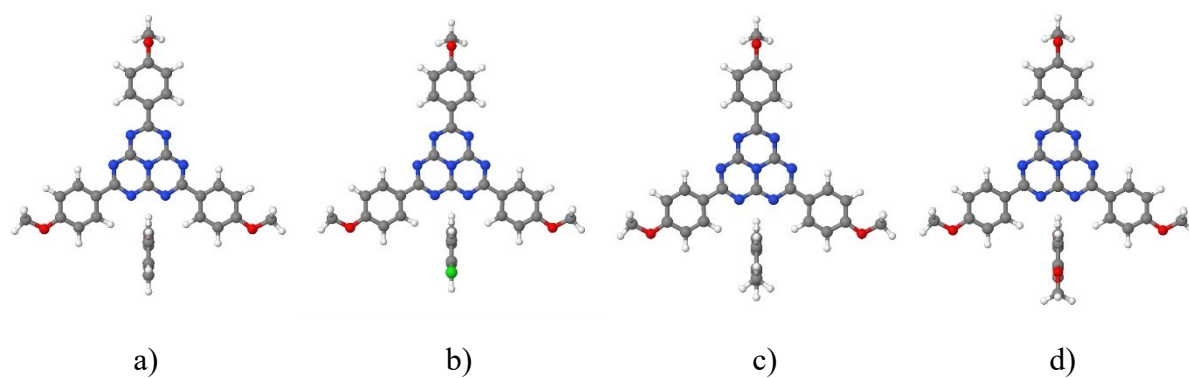

Figure S2. Ground-state equilibrium structures of TAHz...HOPh-H (a), TAHz...HOPh-Cl (b), TAHz...HOPh-Me (c) and TAHz...HOPh-MeO (d) optimized with  $C_s$  symmetry constraint. The OH bond lengths are 2.25 Å (a), 2.26 Å (b), 2.26 Å (c) and 2.26 Å (d); the ON bond lengths are 3.14 Å (a), 3.13 Å (b), 3.14 Å (c) and 3.14 Å (d).

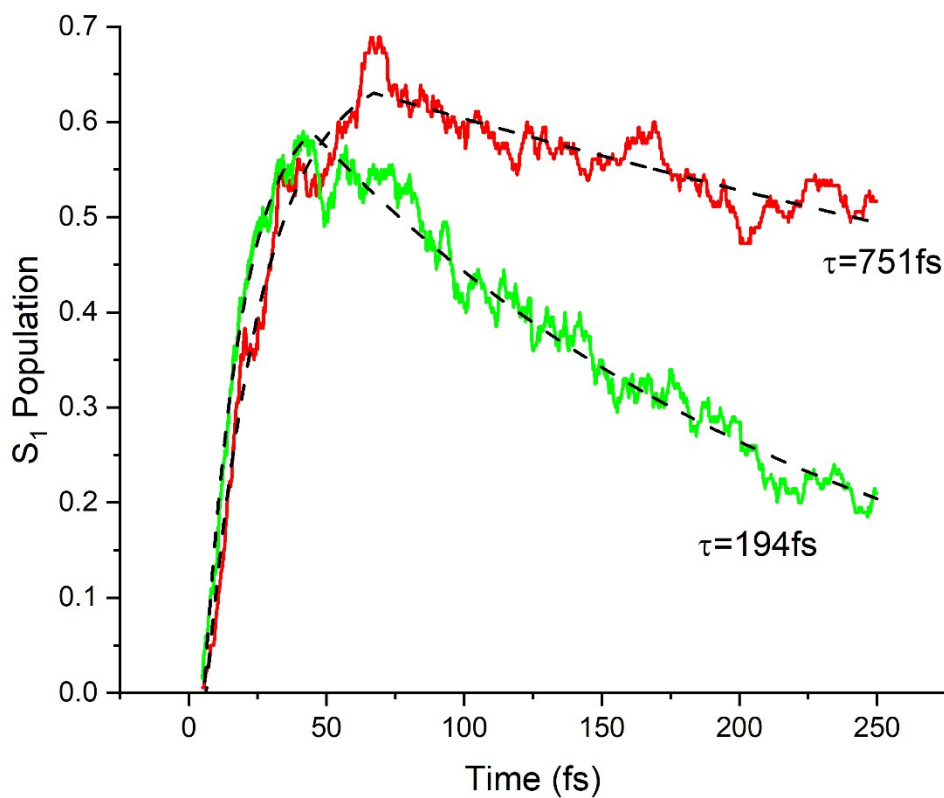

Figure S3. Fit of the populations of the adiabatic  $S_1$  state of TAHz...HOPh-H (red) and TAHz...HOPh-MeO (green) with an exponential growth-decay model. The fitted function is

$$y = f(x) = \begin{cases} A_d + A_g(e^{-x_c/t_g} - e^{-x/t_g}), & x \leq x_c \\ A_d e^{-(x-x_c)/\tau} & , x > x_c \end{cases}$$
